# Supplementary material for: The risk associated with spinal manipulation: an overview of reviews
Source: Springer Nature journal article supplement (doi:10.1186/s13643-017-0458-y), 2017-03-24
Supplement: MOESM3 [file 12174990]

## Search Strategies

The initial search strategy was developed for PubMed and adapted to the other databases. It consists of an intervention filter and review filter:

### PubMed:

((manipulat\*[Title/Abstract] AND spine[Title/Abstract]) OR (manipulat\*[Title/Abstract] AND spinal[Title/Abstract]) OR (manipulat\*[Title/Abstract] AND lumbar[Title/Abstract]) OR (manipulat\*[Title/Abstract] AND back[Title/Abstract]) OR (manipulat\*[Title/Abstract] AND neck [Title/Abstract]) OR (manipulat\*[Title/Abstract] AND cervical[Title/Abstract]) OR (manipulat\*[Title/Abstract] AND thrust[Title/Abstract]) OR (manipulat\*[Title/Abstract] AND osteopath\*[Title/Abstract])) OR "Manipulation, Chiropractic"[Mesh] OR "spinal adjustment\*" OR chiropractic\*)

NOT (animals NOT humans)

AND

(Cochrane[Title/Abstract] OR CENTRAL[Title/Abstract] OR MEDLINE[Title/Abstract] OR EMBASE[Title/Abstract] OR pubmed[Title/Abstract] OR search\*[Title/Abstract] OR "systematic review"[Title/Abstract] OR meta-analysis[Title/Abstract] OR metaanalysis[Title/Abstract] OR "network meta-analysis"[Title/Abstract] OR "Comparative effectiveness"[Title/Abstract] OR "Indirect comparison"[Title/Abstract] OR "mixed treatment comparison"[Title/Abstract] OR "Systematic Literature"[Title/Abstract])

### Cochrane Database of Systematic Reviews, DARE and HTA:

#1 MeSH descriptor: [Manipulation, Chiropractic] explode all trees

#2 "spinal adjustment" and "spinal adjustments" or chiropracti\*

#3 (manipulat\* and spine) or (manipulat\* and spinal) or (manipulat\* and lumbar) or (manipulat\* and back) or (manipulat\* and neck) or (manipulat\* and cervical) or (manipulat\* and thrust) or (manipulat\* and osteopath\*)

#4 #1 or #2 or #3

### EMBASE:

1. (animals not humans).mp. [mp=title, abstract, heading word, drug trade name, original title, device manufacturer, drug manufacturer, device trade name, keyword]

2. ((manipulat\* and spine) or (manipulat\* and spinal) or (manipulat\* and lumbar) or (manipulat\* and back) or (manipulat\* and neck) or (manipulat\* and cervical) or (manipulat\* and thrust) or (manipulat\* and osteopath\*)).ti,ab.
3. ("spinal adjustment" or "spinal adjustments" or chiropracti\*).ti,ab.
4. (Cochrane or CENTRAL or MEDLINE or EMBASE or pubmed or search\* or "systematic review" or meta-analysis or metaanalysis or "network meta-analysis" or "Comparative effectiveness" or "Indirect comparison" or "mixed treatment comparison" or "Systematic Literature").ti,ab.
5. ((2 or 3) and 4) not 1
6. (conference).pt.
7. 5 not 6
