# Supplementary material for: The risk associated with spinal manipulation: an overview of reviews
Source: Springer Nature journal article supplement (doi:10.1186/s13643-017-0458-y), 2017-03-24
Supplement: MOESM8 [file 12174990]

## Opinions Regarding the Safety of Spinal Manipulation Therapy

The risk ratio of having the opinion that spinal manipulation therapy is safe or harmful, respectively, if a 'yes' was obtained in the individual AMSTAR items (33 reviews, whose objective was to investigate adverse events).

|            | Risk ratio (RR)                                |          |                                                   |          |
|------------|------------------------------------------------|----------|---------------------------------------------------|----------|
|            | RR (95% CI) for communicating that SMT is safe | P values | RR (95% CI) for communicating that SMT is harmful | P values |
| AMSTAR #1  | Not estimable†                                 | -        | Not estimable†                                    | -        |
| AMSTAR #2  | Not estimable†                                 | -        | 0.7 (0.2 to 2.4)                                  | 0.516    |
| AMSTAR #3  | 1.1 (0.1 to 8.2)                               | 0.943    | 1.5 (0.4 to 5.2)                                  | 0.516    |
| AMSTAR #4  | Not estimable†                                 | -        | 1.8 (0.7 to 4.6)                                  | 0.318    |
| AMSTAR #5  | Not estimable†                                 | -        | 0.8 (0.2 to 4.4)                                  | 0.824    |
| AMSTAR #6  | 1.1 (0.1 to 8.2)                               | 0.943    | 3.2 (0.5 to 20.8)                                 | 0.131    |
| AMSTAR #7  | 4.0 (0.8 to 20.1)                              | 0.079    | Not estimable†                                    | -        |
| AMSTAR #8  | Not estimable†                                 | -        | Not estimable†                                    | -        |
| AMSTAR #9  | 2.5 (0.4 to 15.8)                              | 0.364    | 0.8 (0.2 to 4.4)                                  | 0.824    |
| AMSTAR #10 | Not estimable*                                 | -        | Not estimable*                                    | -        |
| AMSTAR #11 | Not estimable*                                 | -        | Not estimable*                                    | -        |

AMSTAR, A Measurement Tool to Assess Systematic Reviews; CI, confidence interval; RR, risk ratio; SMT, spinal manipulation therapy.

\*No SRs had a "yes" for this item.

†No SRs had a "yes" for this item and communicated "safe".

(For descriptions of each AMSTAR item, see foot note for Table 2)
